# Supplementary material
Source: ML conference proceedings conference paper supplement (https://openreview.net/forum?id=lD8xaUWw24)
Supplement: supplementary_material [file attachment]

## Sheet: Sheet1
name	LayerII_V1	LayerIV_V1	LayerV_V1	LayerII_S1	LayerIV_S1	LayerV_S1	LayerVPM_center	LayerLGN_center
2014-07-11_14-21-01	33	35	42	3	7	14	26	53
2014-07-23_09-25-09	33	35	42	2	6	13	22	53
2014-08-05_09-26-59		33	40	1	5	12	21	54
2014-08-12_08-42-25	33	36	43	3	7	14	26	52
2014-08-12_13-47-23	33	36	43	5	9	16	24	54
2014-08-14_09-01-04	33	36	43	5	7	14	28	55
2014-08-15_11-02-35	33	36	43	2	6	13	22	55
2015-01-14_16-51-46	33	36	43	6	10	16	27	56
2015-02-03_08-54-58	33	36	43	1	4	11	23	57
2015-02-05_10-13-23	33	37	44	1	4	11	25	59
2015-05-14_12-20-10	33	37	44		1	8	25	54
2015-05-14_15-28-52	33	36	43		1	8	27	55
2015-12-16_14-19-37	33	38	45	5	9	16	28	57
2016-04-07_14-07-47	33	36	43		1	8	26	53
2016-04-13_14-10-07	33	38	45	3	7	14	25	54
2016-04-23_11-45-24		35	42	7	12	16	27	52
2016-07-20_15-29-33	33	37	44	2	7	13	25	51
